# Supplementary material
Source: PubMed Central journal article supplement (PMC2793871)

# Supplementary Figure 1

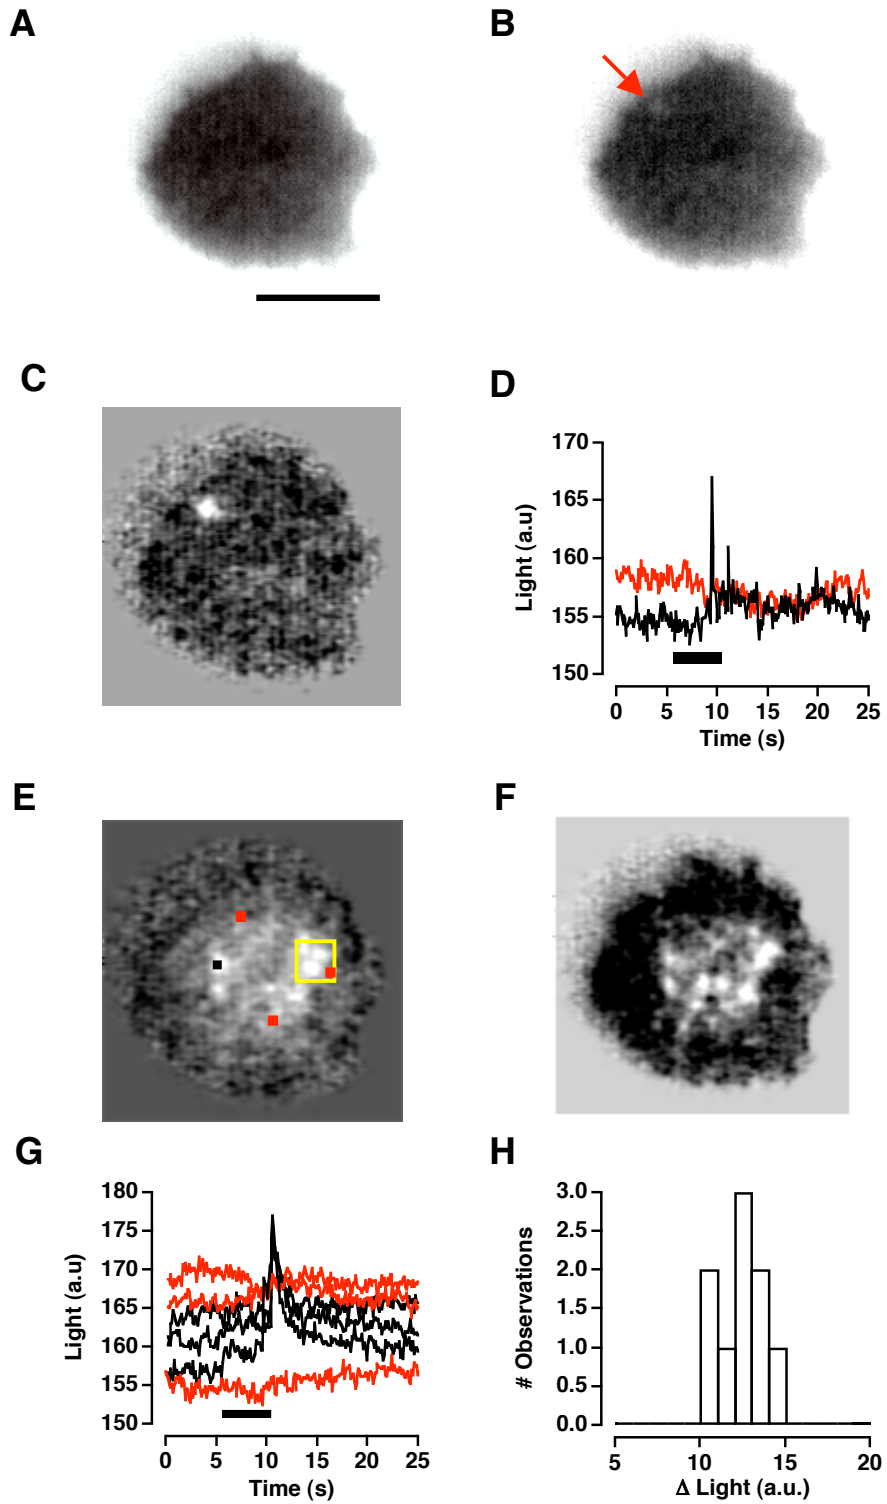

## Supplementary Figure 2

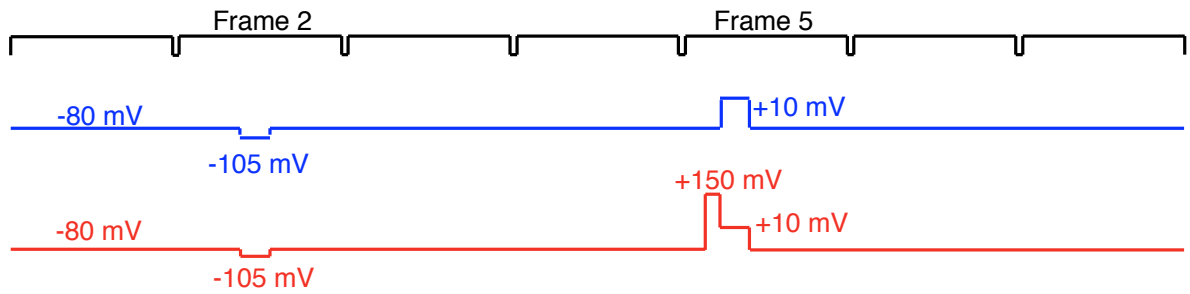

Supplement: tjp0587-5377-SD1.pdf [file tjp0587-5377-SD1.pdf]
